# Supplementary material for: Novel Risk Scoring System for Patients with Metastatic Renal Cell Carcinoma Treated with Immune Checkpoint Inhibitors
Source: PubMed Central journal article supplement — Oncologist. 2019 Dec 5;25(3):e484–91. doi: 10.1634/theoncologist.2019-0578 (PMC7066702; doi:10.1634/theoncologist.2019-0578), 2019-12-05

Supplemental Figures for:  
Novel risk scoring system for metastatic renal cell carcinoma patients treated with immune checkpoint inhibitors  
Mehmet Bilen et al.

**Supplemental Figure S1:** Scatter matrix plot of association between NLR, MLR and PLR

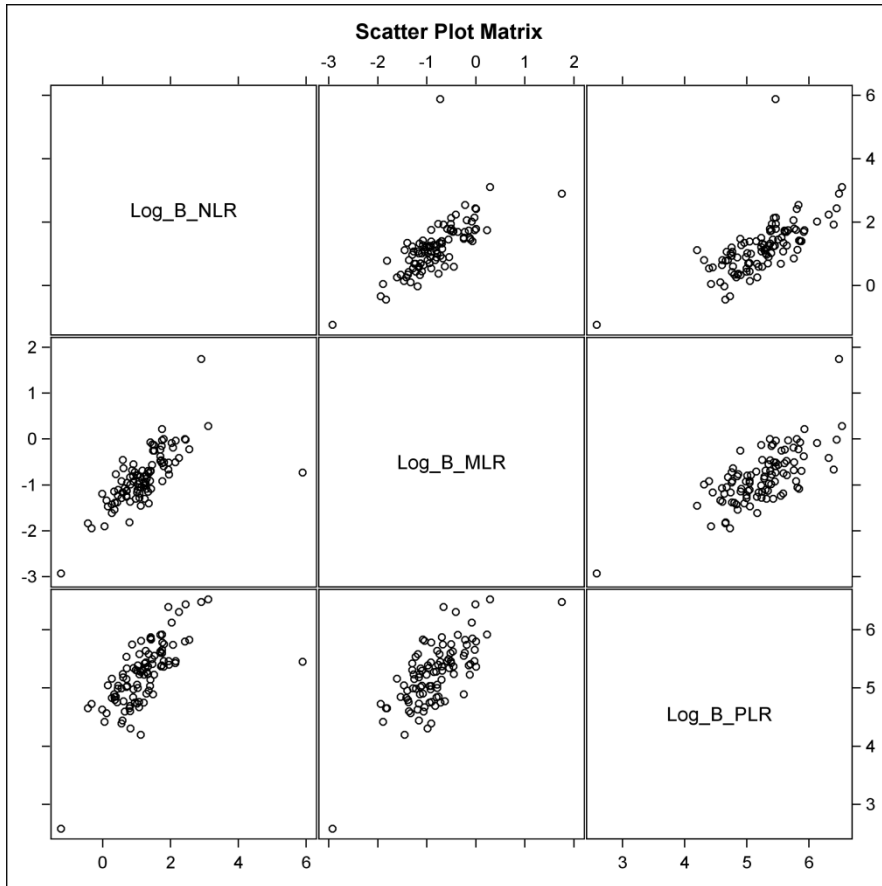

**Supplemental Figure S2:** Kaplan-Meier plot of association between NLR-based risk groups and OS (Top Panel) and PFS (Bottom Panel)

**Risk Groups:** 0=good risk, 1=intermediate risk, 2=poor risk, 3-4=very poor risk

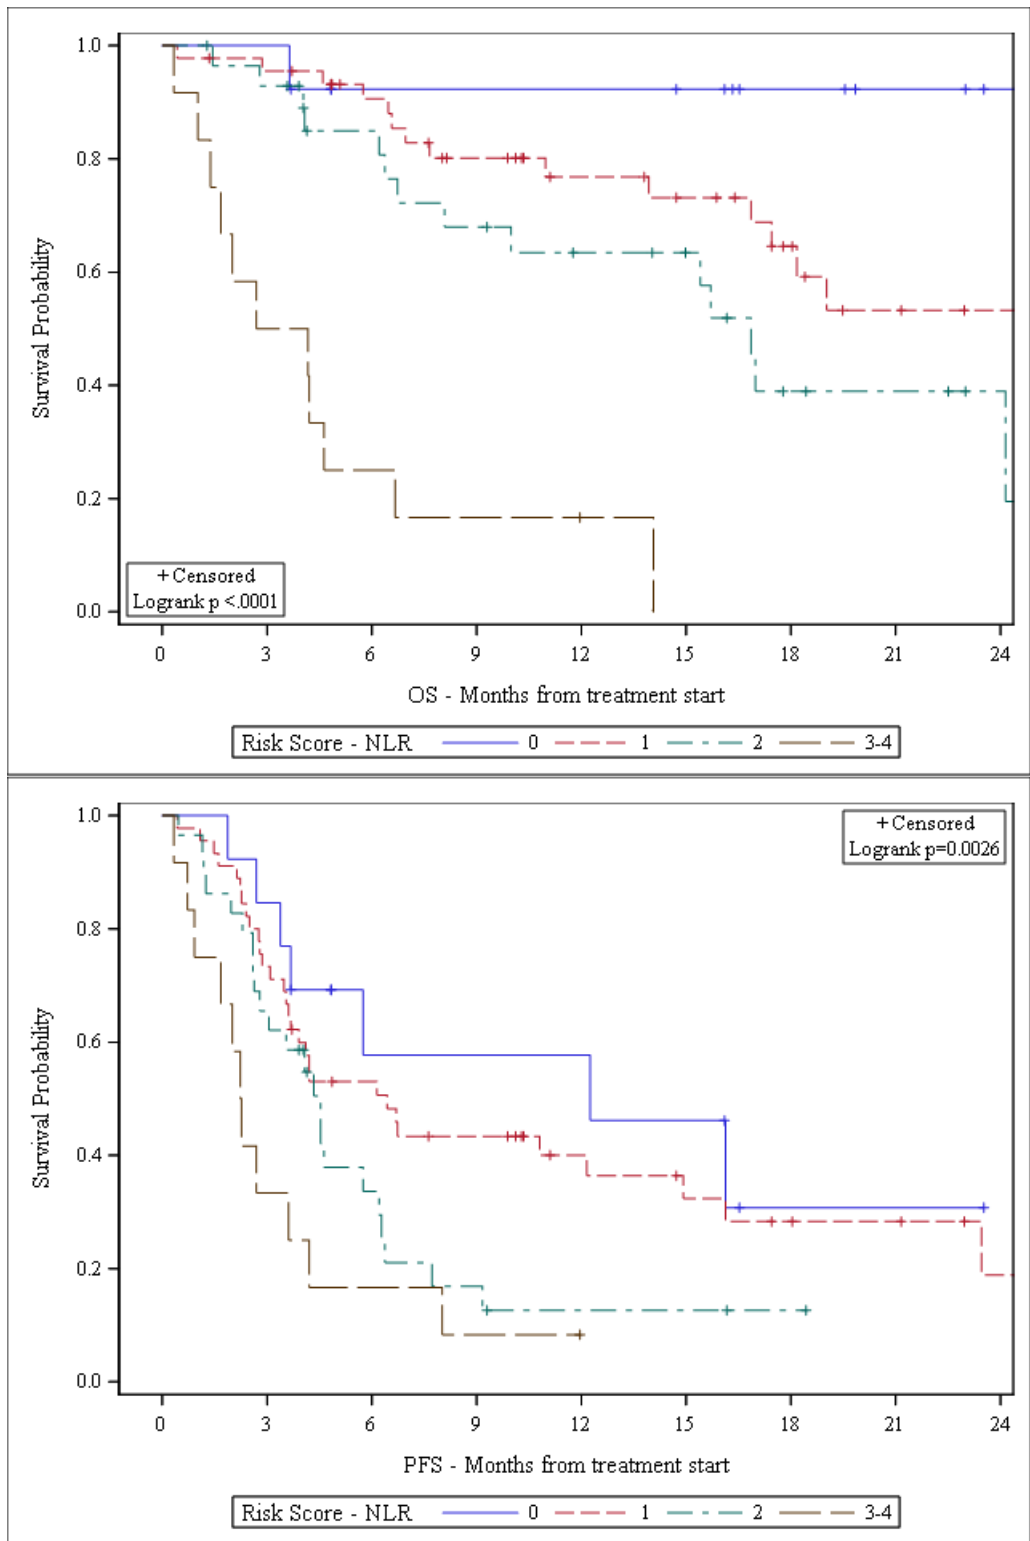

**Supplemental Figure S3:** Kaplan-Meier plot of association between PLR-based risk groups and OS (Top Panel) and PFS (Bottom Panel)

**Risk Groups:** 0=good risk, 1=intermediate risk, 2=poor risk, 3-4=very poor risk

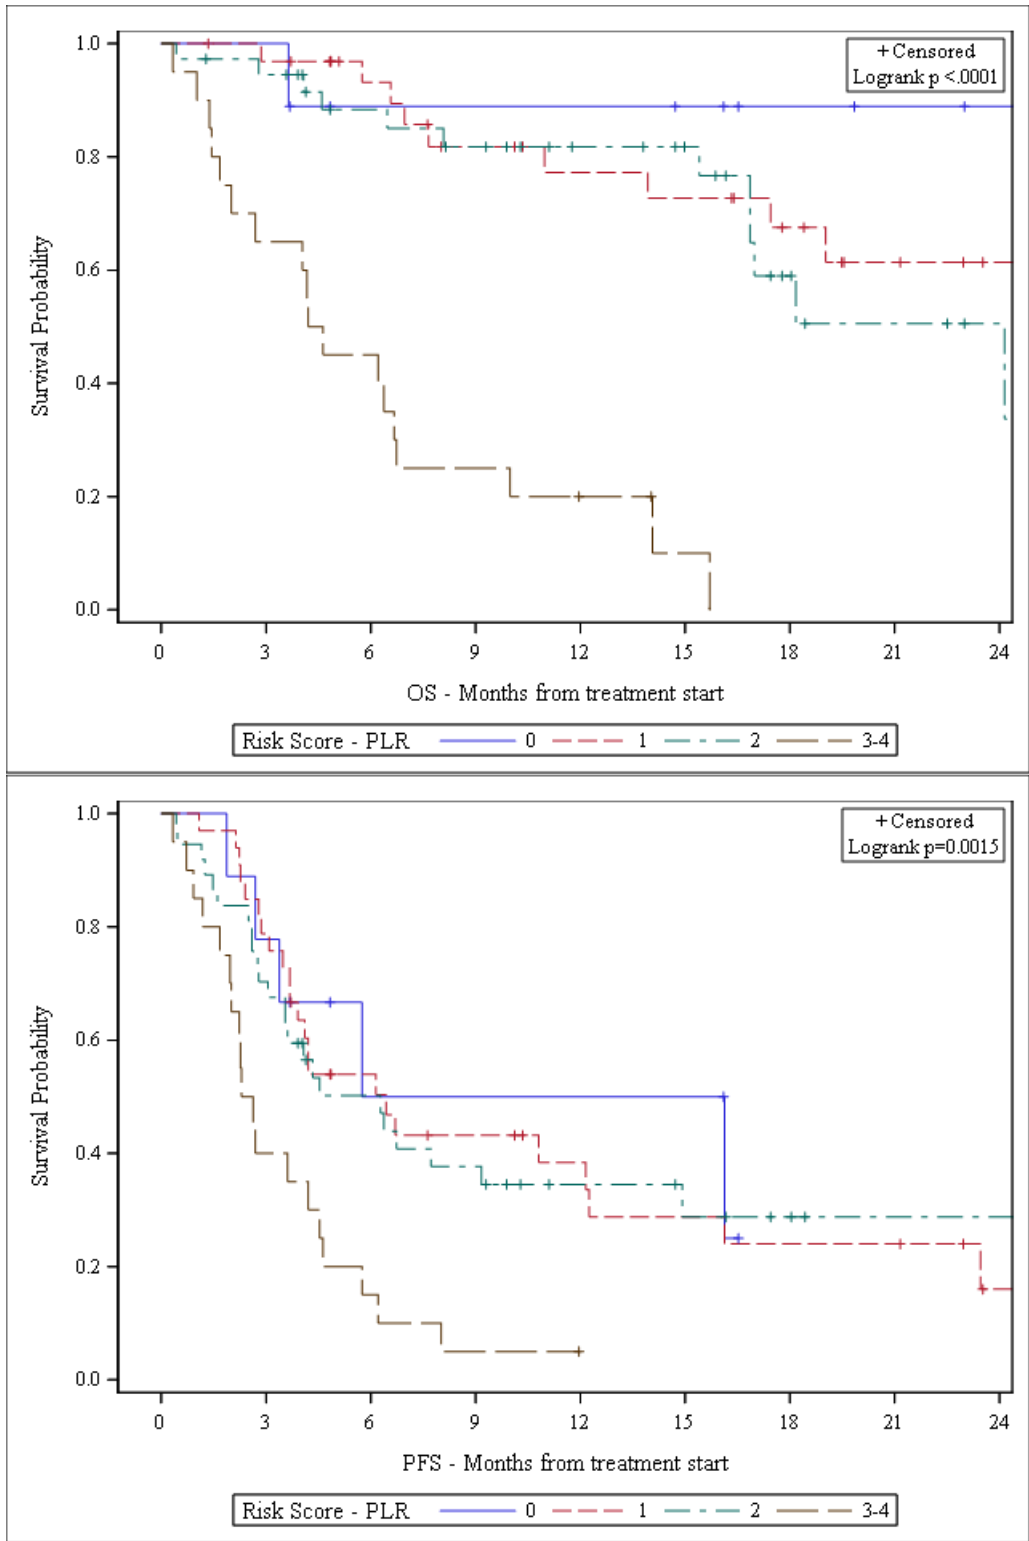

Supplement: ONCO-25-e484-s001.pdf [file ONCO-25-e484-s001.pdf]
